# Supplementary material for: Synthesis and luminescence mechanism of 1D organic metal halides with mixed single-stranded and double-stranded chains
Source: Royal Society of Chemistry journal article supplement (doi:10.1039/d4tc03059a), 2024-01-01
Supplement: d4tc03059a1.pdf [file d4tc03059a1.pdf]

Supporting Information

**Synthesis Mechanism and Luminescence Mechanism of 1D Organic Metal Halides with  
Mixed Single-stranded and Double-stranded chains**

Jiajing Zhou,<sup>†</sup> Dongjie Tian,<sup>§</sup> Kunjie Song,<sup>†</sup> Litipu Aihaiti,<sup>†</sup> Wenhao Bai,<sup>†</sup> Rundong Tian,<sup>†</sup> and  
Rong-Jun Xie<sup>\*,†</sup>

<sup>†</sup> Fujian Province Key Laboratory of Surface and Interface Engineering for High-Performance  
Materials, and College of Materials, Xiamen University, 361005 Xiamen, China

<sup>§</sup> College of Chemistry and Chemical Engineering, Xiamen University, 361005 Xiamen, China

## EXPERIMENTAL METHODS

**Materials.** All experiments were carried out in the air atmosphere with standard Schlenk technology.  $\text{PbBr}_2$  was purchased from Acme (Zhengzhou) Chemical Industry Company. Adenine and HBr (47 wt% in water) were purchased from Meryer (Shanghai) Chemical Technology Company. Acetone were purchased from Sinopharm Chemical Reagent Company and stored in accordance with standard procedures.

**Synthesis of 1.** Adenine (0.135 g, 1 mmol) and  $\text{PbBr}_2$  (1.101 g, 3 mmol) were mixed in 10 mL HBr (47%, in  $\text{H}_2\text{O}$ ) and heated to reflux (the reactants dissolve completely). The reaction system was cooled slowly. After 24 h, white rod-like crystals were formed. Then the crystals were washed with cold acetone, and bulk crystals of **1** were obtained.

**Synthesis of 2.** Adenine (0.135 g, 1 mmol) and  $\text{PbBr}_2$  (1.835 g, 5 mmol) were mixed in 13 mL of 47% HBr (in  $\text{H}_2\text{O}$ ) and heated to reflux, resulting in complete dissolution of the reactants. The reaction mixture was then cooled gradually. After 24 hours, white rod-like crystals formed. These crystals were washed with cold acetone, yielding bulk crystals of compound **2**.

### Physical Measurements.

Single-crystal X-ray diffraction (SCXRD) data were conducted on an Synergy Diffraction Microfocus spot diffractometer with graphite-monochromatized  $\text{Cu K}\alpha$  radiation ( $\lambda = 1.54178 \text{ \AA}$ ) at 100K, operating at 50 kV and 1 mA under  $\text{N}_2$  flow. The multiscan absorption corrections were applied using the program CrysAlis. The crystal structure was solved and refined by least squares on F2 using SHELXTL and OLEX2 programs. The powder X-ray diffraction (PXRD) analysis was performed using a Bruker, D8 ADVANCE X-ray powder diffractometer with  $\text{Cu K}\alpha$  ( $\lambda = 1.5406 \text{ \AA}$ ) operating at 40 kV/40 mA. Optical images were obtained by widefield microscopes (Leica LAS X). Fourier transform infrared (FT-IR) spectra were recorded from 500 to  $4000 \text{ cm}^{-1}$  using a Thermo Scientific Nicolet iS10 FT-IR spectrometer (Waltham). Element content (Pb and Br) were determined on an inductively coupled-source mass spectrometer (ICP-MS, Icap Qc, Thermo Fisher Scientific). TGA was recorded from  $20^\circ\text{C}$  to  $800^\circ\text{C}$  with the  $5^\circ\text{C min}^{-1}$  in nitrogen atmosphere on a TA Instruments SDT Q600 in a  $\text{N}_2$  atmosphere.

### Optical Measurements.

Optical diffuse reflectance measurements were performed using a CACY5000 UV-vis NIR spectrometer operating in the 200–800 nm region at room temperature and  $\text{BaSO}_4$  as the 100% reflectance reference. The reflectance data were converted to absorption according to the Kubelka–Munk equation:  $\alpha/S = (1 - R)^2 (2R)^{-1}$ , where R is the reflectance,  $\alpha$  and S are the absorption and scattering coefficients, respectively. Steady-state photoluminescence spectra were obtained on an Edinburgh Instruments FLS1000 spectrophotometer at room temperature. Time-resolved photoluminescence (TRPL) spectra were acquired using Edinburgh FLS1000 spectrophotometer equipped with a xenon lamp and a TCSPC module (diode laser excitation at  $\lambda = 375 \text{ nm}$ ). The PLQY was determined using an Edinburgh FLS1000 spectrophotometer with an integrating sphere. Temperature-dependent emission and decay data were collected using the FLS1000 spectrophotometer equipped with a closed-cycle cryostat (DE202, Advanced Research Systems) at a series of temperature from 78 to 300 K.

### Calculations.

In this study, we utilized first-principles calculations<sup>1-2</sup> to conduct density functional theory (DFT)

calculations employing the generalized gradient approximation (GGA) according to the Perdew-Burke-Ernzerhof (PBE) formulation.<sup>3</sup> Projected augmented wave (PAW) potentials<sup>4,5</sup> were selected to describe the ionic cores, incorporating valence electrons with a plane wave basis set possessing a kinetic energy cutoff of 450 eV. The Gaussian smearing method was applied to permit partial occupancies of the Kohn–Sham orbitals, with a width of 0.05 eV. Self-consistency of the electronic energy was achieved when the energy change fell below  $10^{-5}$  eV. Geometric optimization was considered convergent when the energy change was smaller than  $0.02 \text{ eV } \text{Å}^{-1}$ . The structural optimization encompassed both atomic coordinate relaxation and lattice parameter optimization. The weak interaction was described by DFT+D3 method using empirical correction in Grimme’s scheme<sup>6-7</sup>. For the optimization of both geometry and lattice size, the BrHouin zone integration was performed with a Monkhorst-pack k-point mesh of  $4 \times 3 \times 1$ . For the excited state optimization, the same computational settings were employed in conjunction with time-dependent density functional theory (TDDFT),<sup>8</sup> a method well-suited for exploring electronic excitations. This dual-level approach provides a comprehensive understanding of both ground and excited state properties.

Table S1. Crystal data and structure refinement for **1**.

| Sample                                                | <b>1</b>                                                                           |
|-------------------------------------------------------|------------------------------------------------------------------------------------|
| Empirical formula                                     | C <sub>10</sub> H <sub>16</sub> Br <sub>7</sub> N <sub>10</sub> OPb <sub>1.5</sub> |
| Formula weight                                        | 1162.48                                                                            |
| Temperature/K                                         | 100                                                                                |
| Crystal system                                        | triclinic                                                                          |
| Space group                                           | $P\bar{1}$                                                                         |
| <i>a</i> (Å)                                          | 6.0058(2)                                                                          |
| <i>b</i> (Å)                                          | 10.2154(2)                                                                         |
| <i>c</i> (Å)                                          | 21.6311(5)                                                                         |
| $\alpha$ (°)                                          | 85.801 (2)                                                                         |
| $\beta$ (°)                                           | 85.807 (2)                                                                         |
| $\gamma$ (°)                                          | 75.400 (2)                                                                         |
| Volume/Å <sup>3</sup>                                 | 1278.75(6)                                                                         |
| Z                                                     | 2                                                                                  |
| $\rho_{\text{calc}}$ g/cm <sup>3</sup>                | 3.019                                                                              |
| $\mu$ /mm <sup>-1</sup>                               | 32.101                                                                             |
| F(000)                                                | 1044.0                                                                             |
| Radiation                                             | Cu K $\alpha$ ( $\lambda$ =1.54184)                                                |
| 2 $\theta$ range for data collection/°                | 8.21 to 150.356                                                                    |
| Index ranges                                          | -7 ≤ <i>h</i> ≤ 7, -12 ≤ <i>k</i> ≤ 11, -26 ≤ <i>l</i> ≤ 26,                       |
| Reflections collected                                 | 14040                                                                              |
| Independent reflections                               | 4990[R <sub>int</sub> =0.0488, R <sub>sigma</sub> =0.0413]                         |
| Data/restraints/parameters                            | 4990/0/274                                                                         |
| Goodness-of-fit on F <sup>2</sup>                     | 1.071                                                                              |
| Final R indexes [ <i>I</i> ≥ 2 $\sigma$ ( <i>I</i> )] | R <sub>1</sub> =0.0441, $\omega$ R <sub>2</sub> =0.1206                            |
| Final R indexes [all data]                            | R <sub>1</sub> =0.0455, $\omega$ R <sub>2</sub> =0.1222                            |
| Largest diff. peak/hole/e Å <sup>-3</sup>             | 4.62/-1.64                                                                         |

Table S2. Elemental analysis (by ICP-MS) of Pb and Br.

| Element                         | Pb     | Br      |
|---------------------------------|--------|---------|
| Mass concentration (μg/L)       | 43.619 | 118.321 |
| Molar mass (g/mol)              | 207.20 | 79.90   |
| Molar concentration<br>(mmol/L) | 0.2105 | 1.4808  |
| Relative molar ratio            | 2.00   | 14.06   |

The ICP-MS measurement was used to determine the relative atom ratios of Pb and Br. The result shows that the element ratio of Pb/Br is 2/14.06, which was highly close to the theoretical value 2/14.

Table S3. Experimental bond lengths and angles of the  $[\text{PbBr}_5]^{3-}$  groups of single-stranded chain in **1**.

| Bonds                 | Length (Å)  | Angles                     | Degrees (°) |
|-----------------------|-------------|----------------------------|-------------|
| Pb1–Br1 <sup>#1</sup> | 3.00290(9)  | Br1–Pb1–Br1 <sup>#1</sup>  | 180.0       |
| Pb1–Br1               | 3.00290(11) | Br1–Pb1–Br4                | 85.413(15)  |
| Pb1–Br4 <sup>#2</sup> | 3.0225(7)   | Br1–Pb1–Br4                | 94.587(15)  |
| Pb1–Br4               | 3.0225(7)   | Br1–Pb1–Br4 <sup>#2</sup>  | 85.414(15)  |
| Pb1–Br8 <sup>#2</sup> | 2.9873(9)   | Br1 <sup>#1</sup> –Pb1–Br4 | 94.586(15)  |
| Pb1–Br8               | 2.9873(9)   | Br4–Pb1–Br4 <sup>#2</sup>  | 180.0       |
|                       |             | Br8–Pb1–Br1                | 85.453(19)  |
|                       |             | Br8 <sup>#2</sup> –Pb1–Br1 | 85.453(19)  |
|                       |             | Br8–Pb1–Br1                | 94.547(19)  |
|                       |             | Br8–Pb1–Br1 <sup>#1</sup>  | 94.547(19)  |
|                       |             | Br8–Pb1–Br4                | 90.65(2)    |
|                       |             | Br8 <sup>#2</sup> –Pb1–Br4 | 89.35(2)    |
|                       |             | Br8–Pb1–Br4                | 90.65(2)    |
|                       |             | Br8–Pb1–Br4 <sup>#2</sup>  | 89.35(2)    |
|                       |             | Br8–Pb1–Br8 <sup>#2</sup>  | 180.0       |

Table S4. Experimental bond lengths and angles of the  $[\text{Pb}_2\text{Br}_9]^{5-}$  groups of double-stranded chain in **1**.

| Bonds                 | Length (Å) | Angles                     | Degrees (°) |
|-----------------------|------------|----------------------------|-------------|
| Pb2–Br2               | 3.0302(8)  | Br2–Pb2–Br3                | 89.26(2)    |
| Pb2–Br3 <sup>#1</sup> | 3.0964(8)  | Br2–Pb2–Br6                | 95.745(15)  |
| Pb2–Br3               | 2.9238(8)  | Br3 <sup>#1</sup> –Pb2–Br2 | 92.39(2)    |
| Pb2–Br5               | 2.9263(8)  | Br3–Pb2–Br3                | 172.07(3)   |
| Pb2–Br6               | 3.0660(3)  | Br3 <sup>#1</sup> –Pb2–Br5 | 94.92(2)    |
| Pb2–Br7               | 2.9369(8)  | Br3–Pb2–Br6                | 90.323(18)  |
|                       |            | Br3 <sup>#1</sup> –Pb2–Br7 | 83.51(3)    |
|                       |            | Br5–Pb2–Br2                | 172.55(2)   |
|                       |            | Br5–Pb2–Br3                | 83.69(2)    |
|                       |            | Br5–Pb2–Br6                | 85.649(17)  |
|                       |            | Br5–Pb2–Br7                | 86.97(2)    |
|                       |            | Br6–Pb2–Br3                | 81.795(17)  |
|                       |            | Br7–Pb2–Br2                | 92.45(2)    |
|                       |            | Br7–Pb2–Br3                | 104.18(2)   |
|                       |            | Br7–Pb2–Br6                | 169.94(2)   |

Table S5. Changes of bond lengths between ground state and excited state of the  $[\text{PbBr}_5]^{3-}$  groups of single-stranded chain in **1**.

|               | Pb1–Br1 <sup>#1</sup> | Pb1–Br1 | Pb1–Br4 <sup>#2</sup> | Pb1–Br4 | Pb1–Br8 <sup>#2</sup> | Pb1–Br8 |
|---------------|-----------------------|---------|-----------------------|---------|-----------------------|---------|
| Ground state  | 3.003                 | 3.003   | 3.023                 | 3.023   | 2.987                 | 2.987   |
| Excited state | 3.031                 | 3.005   | 3.015                 | 2.967   | 3.528                 | 2.767   |

Table S6. Changes of bond angles between ground state and excited state of the  $[\text{PbBr}_5]^{3-}$  groups of single-stranded chain in **1**.

|               | Br1–Pb1–<br>Br4 | Br1–Pb1–<br>Br4 <sup>#2</sup> | Br1 <sup>#1</sup> –<br>Pb1–Br4 | Br1 <sup>#1</sup> –Pb1–<br>Br4 <sup>#2</sup> | Br8–Pb1–<br>Br1 | Br8 <sup>#2</sup> –<br>Pb1–Br1 |
|---------------|-----------------|-------------------------------|--------------------------------|----------------------------------------------|-----------------|--------------------------------|
| Ground state  | 85.413          | 94.587                        | 85.413                         | 94.587                                       | 85.453          | 85.453                         |
| Excited state | 82.500          | 83.028                        | 95.483                         | 98.197                                       | 84.336          | 82.979                         |

  

|               | Br8–Pb1–<br>Br1 <sup>#1</sup> | Br8 <sup>#2</sup> –<br>Pb1–Br1 <sup>#1</sup> | Br8–Pb1–<br>Br4 | Br8–Pb1–<br>Br4 <sup>#2</sup> | Br8 <sup>#2</sup> –<br>Pb1–Br4 | Br8 <sup>#2</sup> –<br>Pb1–Br4 <sup>#2</sup> |
|---------------|-------------------------------|----------------------------------------------|-----------------|-------------------------------|--------------------------------|----------------------------------------------|
| Ground state  | 94.547                        | 94.547                                       | 90.653          | 89.356                        | 90.653                         | 89.356                                       |
| Excited state | 91.066                        | 98.468                                       | 95.716          | 80.970                        | 95.812                         | 89.514                                       |

Table S7. Changes of bond lengths between ground state and excited state of the  $[\text{Pb}_2\text{Br}_9]^{5-}$  groups of double-stranded chain in **1**.

|               | Pb2–Br2 | Pb2–Br3 <sup>#1</sup> | Pb2–Br3 | Pb2–Br5 | Pb2–Br6 | Pb2–Br7 |
|---------------|---------|-----------------------|---------|---------|---------|---------|
| Ground state  | 3.030   | 3.096                 | 2.924   | 2.926   | 3.066   | 2.937   |
| Excited state | 3.029   | 3.056                 | 2.944   | 3.002   | 2.882   | 2.945   |

  

|               | Pb2–Br2 | Pb2–Br3 <sup>#1</sup> | Pb2–Br3 | Pb2–Br5 | Pb2–Br6 | Pb2–Br7 |
|---------------|---------|-----------------------|---------|---------|---------|---------|
| Ground state  | 3.030   | 3.096                 | 2.924   | 2.926   | 3.066   | 2.937   |
| Excited state | 3.004   | 2.951                 | 3.055   | 2.987   | 3.259   | 3.385   |

Table S8. Changes of bond angles between ground state and excited state of the  $[\text{Pb}_2\text{Br}_9]^{5-}$  groups of double-stranded chain in **1**.

|               |                 |                 |                 |                 |                 |                 |
|---------------|-----------------|-----------------|-----------------|-----------------|-----------------|-----------------|
|               | Br2–Pb2–<br>Br3 | Br2–Pb2–<br>Br6 | Br3–Pb2–<br>Br2 | Br3–Pb2–<br>Br5 | Br3–Pb2–<br>Br6 | Br3–Pb2–<br>Br7 |
| Ground state  | 89.263          | 95.745          | 92.394          | 94.926          | 90.323          | 83.515          |
| Excited state | 95.301          | 88.248          | 84.726          | 86.091          | 95.380          | 91.407          |
|               |                 |                 |                 |                 |                 |                 |
|               | Br5–Pb2–<br>Br3 | Br5–Pb2–<br>Br6 | Br5–Pb2–<br>Br7 | Br6–Pb2–<br>Br3 | Br7–Pb2–<br>Br2 | Br7–Pb2–<br>Br3 |
| Ground state  | 83.690          | 85.649          | 86.974          | 81.795          | 92.453          | 104.186         |
| Excited state | 90.907          | 88.993          | 94.082          | 86.960          | 102.353         | 76.611          |
|               |                 |                 |                 |                 |                 |                 |
|               | Br2–Pb2–<br>Br3 | Br2–Pb2–<br>Br6 | Br3–Pb2–<br>Br2 | Br3–Pb2–<br>Br5 | Br3–Pb2–<br>Br6 | Br3–Pb2–<br>Br7 |
| Ground state  | 89.263          | 95.745          | 92.394          | 94.926          | 90.323          | 83.515          |
| Excited state | 88.979          | 83.039          | 92.880          | 92.126          | 87.265          | 99.880          |
|               |                 |                 |                 |                 |                 |                 |
|               | Br5–Pb2–<br>Br3 | Br5–Pb2–<br>Br6 | Br5–Pb2–<br>Br7 | Br6–Pb2–<br>Br3 | Br7–Pb2–<br>Br2 | Br7–Pb2–<br>Br3 |
| Ground state  | 83.690          | 85.649          | 86.974          | 81.795          | 92.453          | 104.186         |
| Excited state | 94.501          | 81.522          | 82.190          | 103.438         | 82.503          | 91.400          |



Table S9. Crystal data and structure refinement for **2**.

| Sample                                                | <b>2</b>                                                                                       |
|-------------------------------------------------------|------------------------------------------------------------------------------------------------|
| Empirical formula                                     | C <sub>10</sub> H <sub>18</sub> Br <sub>8</sub> N <sub>10</sub> O <sub>2</sub> Pb <sub>2</sub> |
| Formula weight                                        | 1364.00                                                                                        |
| Temperature/K                                         | 150                                                                                            |
| Crystal system                                        | monoclinic                                                                                     |
| Space group                                           | P2 <sub>1</sub> /c                                                                             |
| <i>a</i> (Å)                                          | 6.0771(2)                                                                                      |
| <i>b</i> (Å)                                          | 18.3935(7)                                                                                     |
| <i>c</i> (Å)                                          | 25.4976(9)                                                                                     |
| $\alpha$ (°)                                          | 90                                                                                             |
| $\beta$ (°)                                           | 94.3470 (10)                                                                                   |
| $\gamma$ (°)                                          | 90                                                                                             |
| Volume/Å <sup>3</sup>                                 | 2841.90.(17)                                                                                   |
| <i>Z</i>                                              | 4                                                                                              |
| $\rho_{\text{calc}}$ g/cm <sup>3</sup>                | 3.188                                                                                          |
| $\mu$ /mm <sup>-1</sup>                               | 23.109                                                                                         |
| F(000)                                                | 2432.0                                                                                         |
| Radiation                                             | Mo K $\alpha$ ( $\lambda$ =0.71073)                                                            |
| 2 $\theta$ range for data collection/°                | 4.428 to 52.826                                                                                |
| Index ranges                                          | -7 ≤ <i>h</i> ≤ 7, -23 ≤ <i>k</i> ≤ 23, -31 ≤ <i>l</i> ≤ 31,                                   |
| Reflections collected                                 | 51113                                                                                          |
| Independent reflections                               | 5842[R <sub>int</sub> =0.0881, R <sub>sigma</sub> =0.0482]                                     |
| Data/restraints/parameters                            | 5842/0/295                                                                                     |
| Goodness-of-fit on F <sup>2</sup>                     | 0.998                                                                                          |
| Final R indexes [ <i>I</i> ≥ 2 $\sigma$ ( <i>I</i> )] | R <sub>1</sub> =0.0314, $\omega$ R <sub>2</sub> =0.0584                                        |
| Final R indexes [all data]                            | R <sub>1</sub> =0.0621, $\omega$ R <sub>2</sub> =0.0668                                        |
| Largest diff. peak/hole/e Å <sup>-3</sup>             | 0.87/-0.88                                                                                     |

Table S10. Experimental bond lengths and angles of the [PbBr<sub>4</sub>]<sup>2-</sup> groups of **2**.

| Bonds                 | Length (Å) | Angles                     | Degrees (°) |
|-----------------------|------------|----------------------------|-------------|
| Pb1–Br5               | 2.9312(9)  | Br5–Pb1–Br6                | 173.11(2)   |
| Pb1–Br6               | 3.1020(9)  | Br5–Pb1–Br7                | 89.70(3)    |
| Pb1–Br7               | 2.9635(9)  | Br5–Pb1–Br8                | 82.40(2)    |
| Pb1–Br8 <sup>1</sup>  | 3.0660(8)  | Br5–Pb1–Br8 <sup>1</sup>   | 94.06(2)    |
| Pb1–Br8               | 3.0154(8)  | Br5–Pb1–Br9                | 90.47(2)    |
| Pb1–Br9               | 3.0398(9)  | Br7–Pb1–Br6                | 86.18(2)    |
| Pb2–Br3               | 2.8336(8)  | Br7–Pb1–Br8 <sup>1</sup>   | 89.69(2)    |
| Pb2–Br4               | 2.8828(9)  | Br7–Pb1–Br8                | 92.73(2)    |
| Pb2–Br6               | 3.1816(9)  | Br7–Pb1–Br9                | 177.16(2)   |
| Pb2–Br9               | 3.1809(9)  | Br8–Pb1–Br6                | 92.29(2)    |
| Pb2–Br10              | 3.0147(8)  | Br8 <sup>1</sup> –Pb1–Br6  | 91.43(2)    |
| Pb2–Br10 <sup>1</sup> | 3.0666(8)  | Br8–Pb1–Br8 <sup>1</sup>   | 175.69(3)   |
|                       |            | Br8–Pb1–Br9                | 90.10(2)    |
|                       |            | Br9–Pb1–Br6                | 93.92(2)    |
|                       |            | Br9–Pb1–Br8 <sup>1</sup>   | 87.47(2)    |
|                       |            | Br3–Pb2–Br4                | 88.05(2)    |
|                       |            | Br3–Pb2–Br6                | 172.27(2)   |
|                       |            | Br3–Pb2–Br9                | 95.49(2)    |
|                       |            | Br3–Pb2–Br10 <sup>1</sup>  | 86.59(2)    |
|                       |            | Br3–Pb2–Br10               | 97.52(2)    |
|                       |            | Br4–Pb2–Br6                | 86.51(2)    |
|                       |            | Br4–Pb2–Br9                | 175.85(2)   |
|                       |            | Br4–Pb2–Br10 <sup>1</sup>  | 89.78(2)    |
|                       |            | Br4–Pb2–Br10               | 91.44(2)    |
|                       |            | Br9–Pb2–Br6                | 89.75(2)    |
|                       |            | Br10 <sup>1</sup> –Pb2–Br6 | 87.91(2)    |
|                       |            | Br10–Pb2–Br6               | 88.11(2)    |
|                       |            | Br10 <sup>1</sup> –Pb2–Br9 | 88.29(2)    |
|                       |            | Br10–Pb2–Br9               | 90.24(2)    |
|                       |            | Br10–Pb2–Br10 <sup>1</sup> | 175.75(4)   |

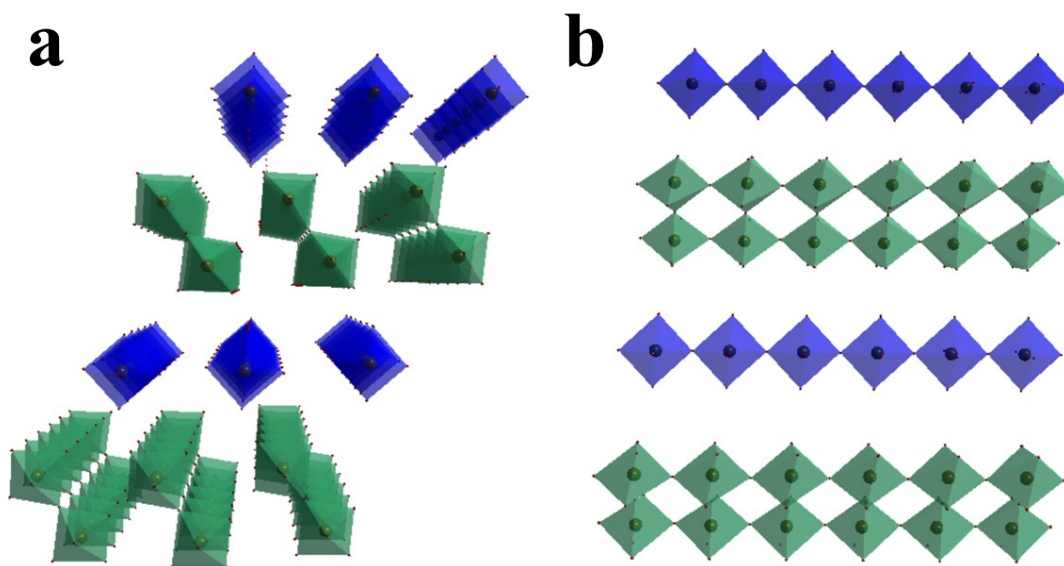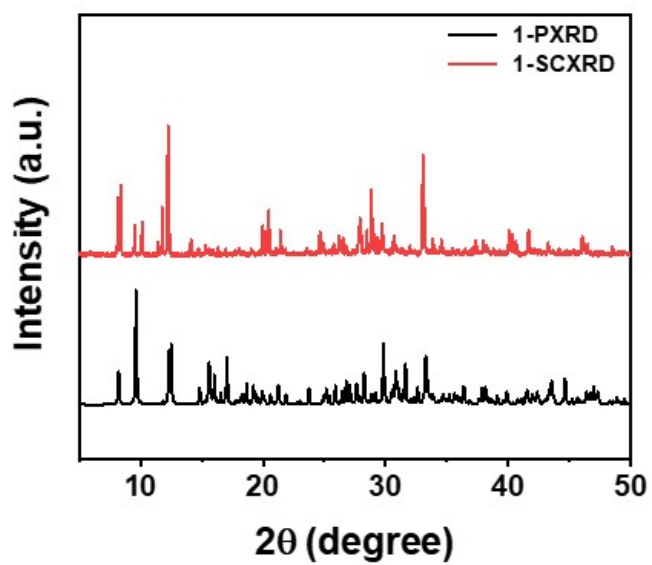

Figure S2. PXRD patterns and the simulated XRD patterns based on the single crystal of **1**.

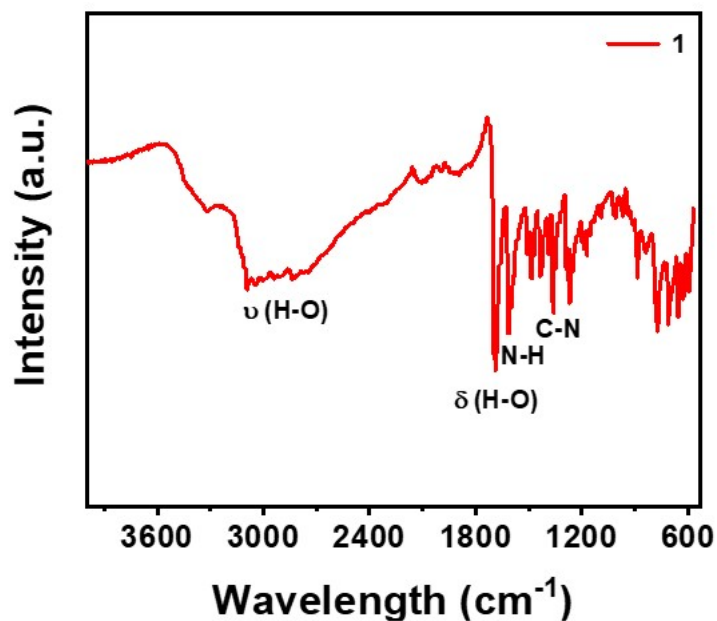

Figure S3. FTIR spectrum of **1** crystal.

The broad absorption in the range of 3000-3600 cm<sup>-1</sup> is assigned to H-O stretching vibration ( $\nu_{\text{H-O}}$ ) of the combined water, and the narrow absorption from 1600 to 1700 cm<sup>-1</sup> is assigned to H-O bending vibration ( $\delta_{\text{H-O}}$ ) of the combined water. The absorption peaks centered at 1609 cm<sup>-1</sup> is assigned to N-H bending vibration. The absorption peaks centered at 1357 cm<sup>-1</sup> is assigned to C-N stretching vibration. The result verifies the existence of the organic cations and coordinating water in 1D-OMH **1**.

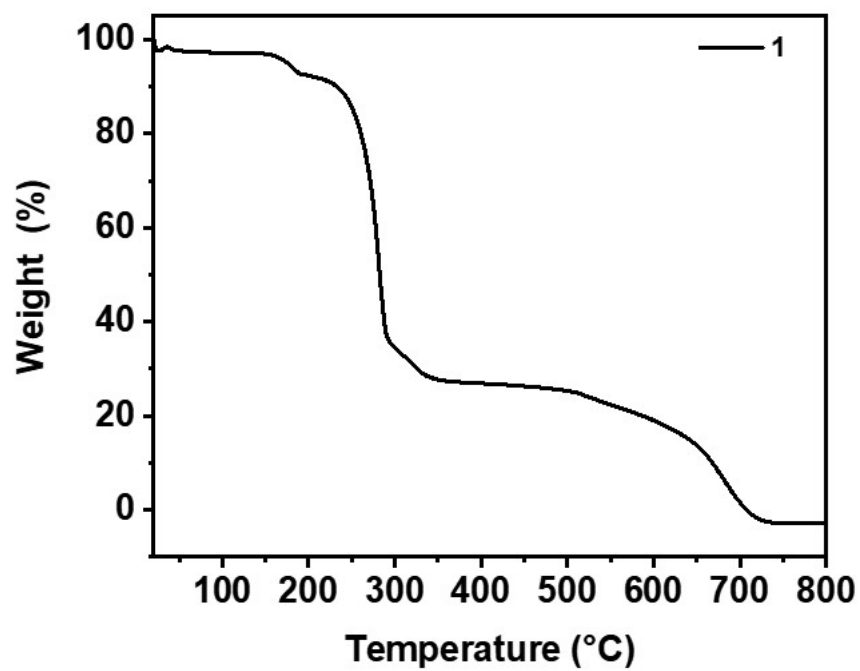

Figure S4. The TG curve of 1.

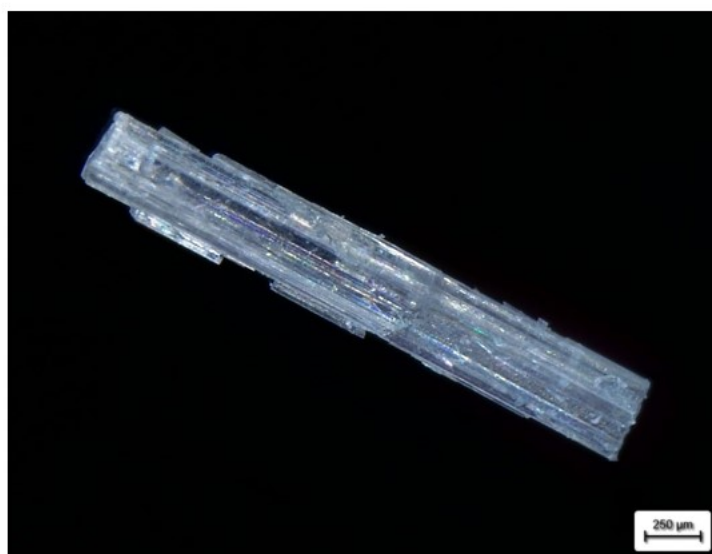

Figure S5. Images of 1 single crystals.

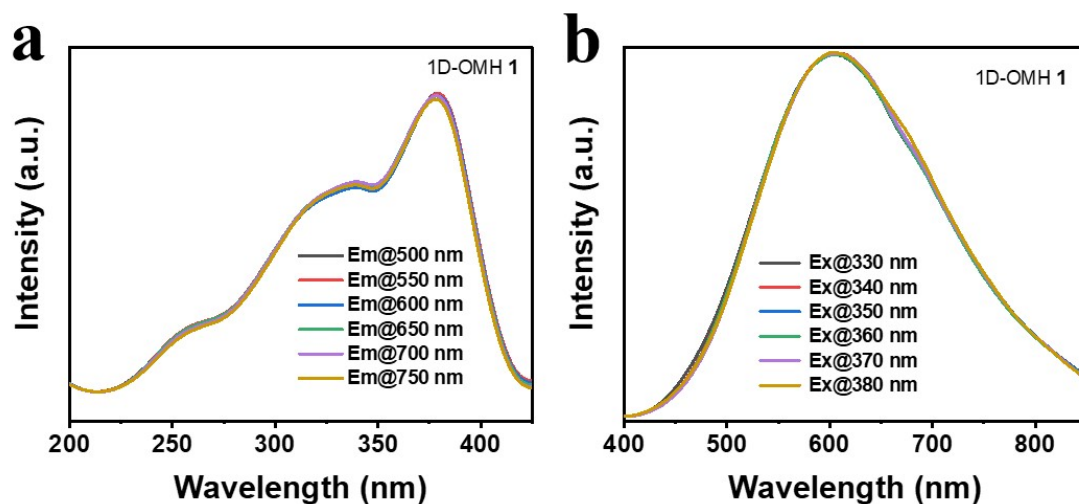

Figure S6. a) The PLE spectra of 1D-OMH 1 monitoring at 500 nm, 550 nm, 600 nm, 650 nm 700 nm and 750 nm, respectively. b) The excitation wavelength-dependent PL spectra of 1D-OMH 1. (the excitation wavelength ranged from 330 nm to 380 nm and the interval is 10 nm).

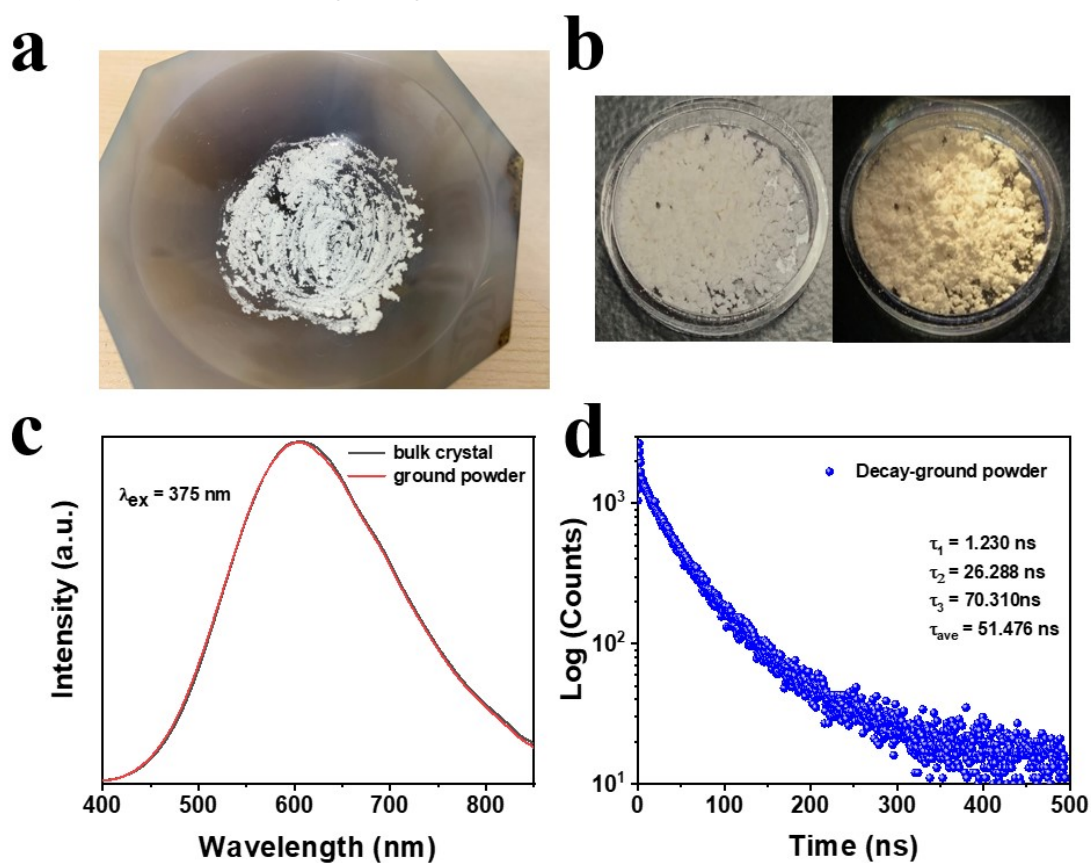

Figure S7. a) Grinding single crystals into powder using a mortar and pestle. b) Images under natural light and 365 nm UV light excitation of ground powders of 1D-OMH 1. c) The PL spectra of bulk crystals and ground powders of 1D-OMH 1. d) The time-resolved decay curves of ground powders of 1D-OMH 1.

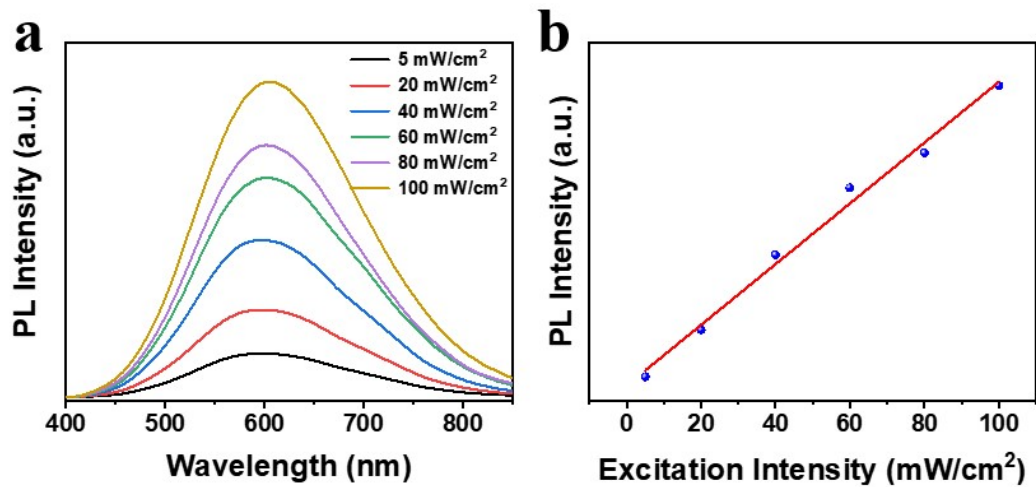

Figure S8. (a) Power dependence PL spectra for **1**. (b) The PL intensity versus excitation power of **1**.

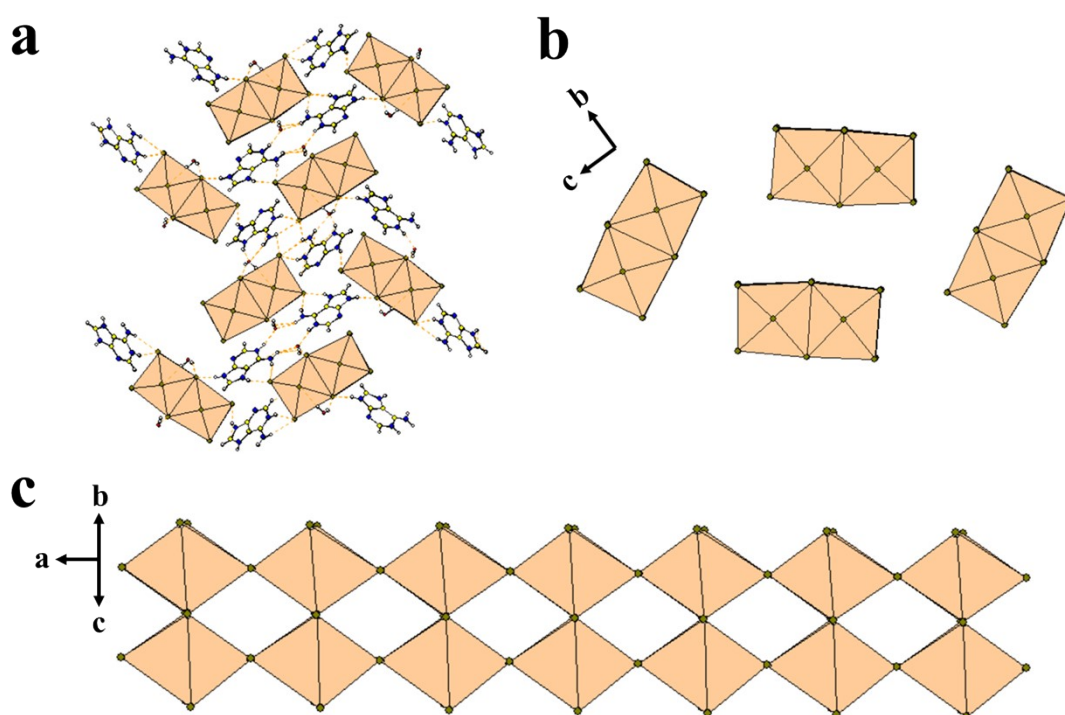

Figure S9. Detailed view of crystal structure **2**. (a,b) Top-down view of **2**. (c) Side view of **2**.

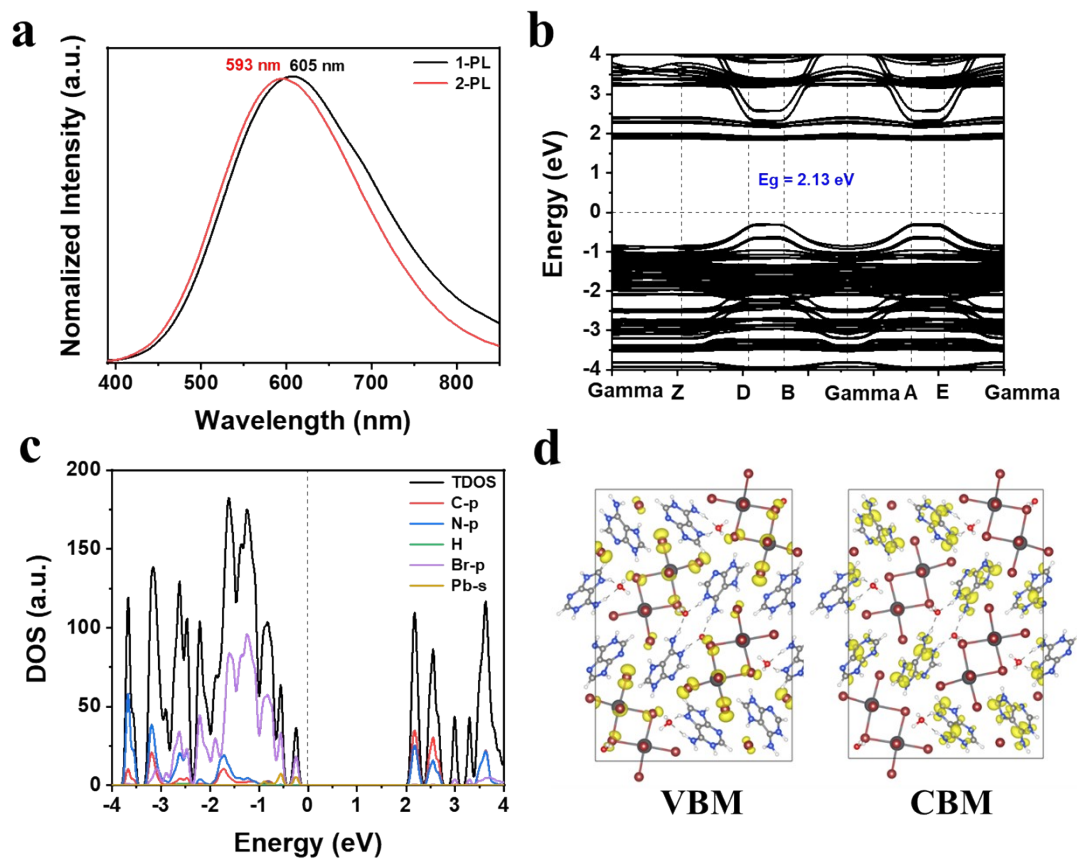

Figure S10. a) emission spectra of **1** and **2**. b) DFT electronic band structure of **2**. c) Density of states of **2**. d) Spatial contour of antibonding (left) and bonding frontier orbitals (right) of **2**.

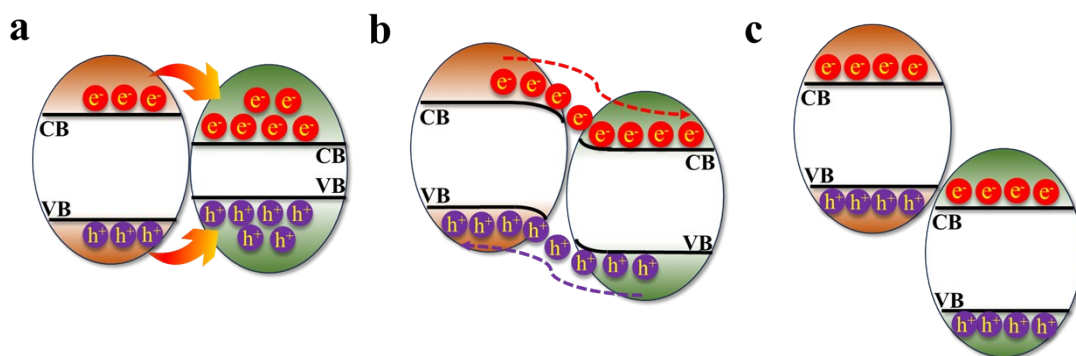

Figure S11. Schematic illustration of the three different types of heterojunction energy band arrangement: a) type-I, b) type-II, and c) type-III heterojunctions.



## References

1. Kresse, G.; Furthmüller, J., Efficiency of ab-initio total energy calculations for metals and semiconductors using a plane-wave basis set. *Comp. Mater. Sci.* 1996, 6, 15.
2. Kresse, G.; Furthmüller, J., Efficient iterative schemes for ab initio total-energy calculations using a plane-wave basis set. *Phys. Rev. B* 1996, 54, 11169
3. Perdew, J. P.; Burke, K.; Ernzerhof, M., Generalized Gradient Approximation Made Simple. *Phys. Rev. Lett.* 1996, 77, 3865.
4. Kresse, G.; Joubert, D., From ultrasoft pseudopotentials to the projector augmented-wave method. *Phys. Rev. B* 1999, 59, 1758.
5. Blochl, P., Projector augmented-wave method. *Phys. Rev. B* 1994, 50, 24.
6. Grimme, S.; Antony, J.; Ehrlich, S.; Krieg, H., A consistent and accurate ab initio parametrization of density functional dispersion correction (DFT-D) for the 94 elements H-Pu. *J. Chem. Phys.* 2010, 132, 154104.
7. Grimme, S.; Ehrlich, S.; Goerigk, L., Effect of the damping function in dispersion corrected density functional theory. *J. Comput. Chem.* 2011, 32, 1456.
8. M.A.L. Marques, E.K.U. Gross, "Time-dependent density functional theory," *Annu. Rev. Phys. Chem.*, 55, 427-455 (2004).
